# Supplementary material for: Genic Intolerance to Functional Variation and the Interpretation of Personal Genomes
Source: PubMed Central journal article supplement (PMC3749936; doi:10.1371/journal.pgen.1003709), 2013-08-22

**A) Pearson's  $r$  correlation coefficient = 0.849**

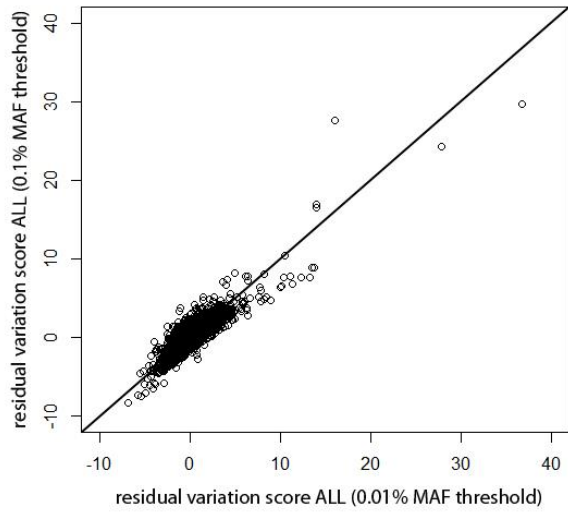

**B) Pearson's  $r$  correlation coefficient = 0.813**

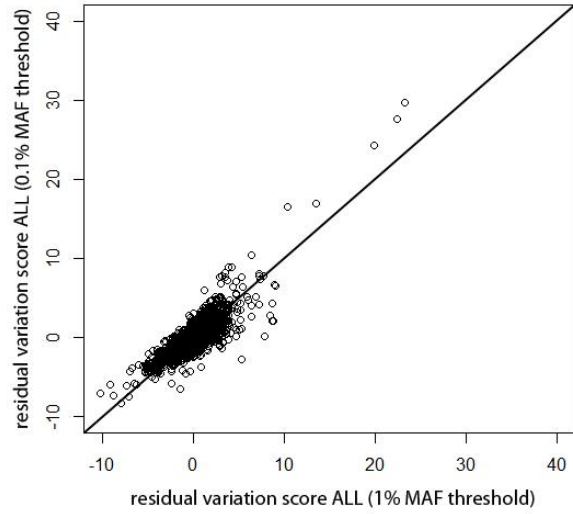

**C) Pearson's  $r$  correlation coefficient = 0.862**

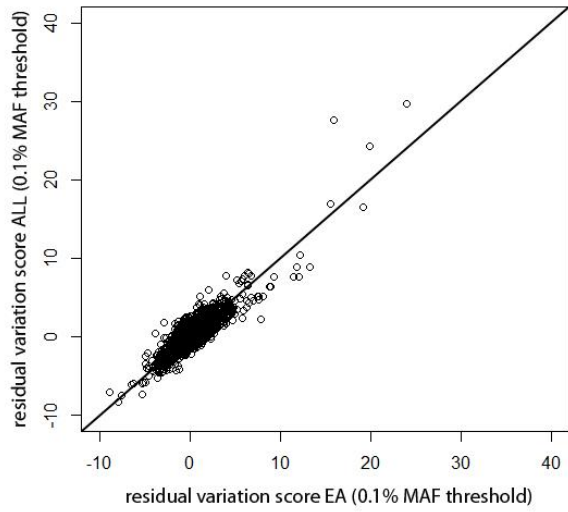

**D) Pearson's  $r$  correlation coefficient = 0.908**

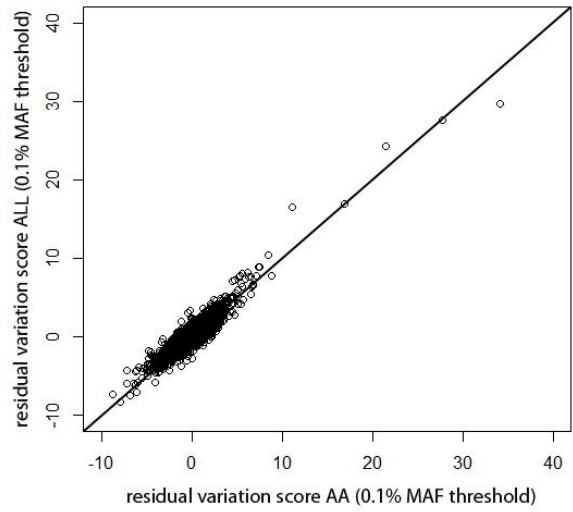

**E) Pearson's  $r$  correlation coefficient = 0.836**

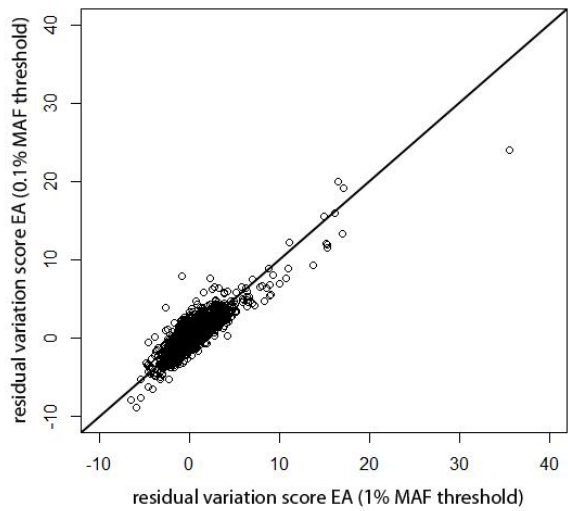

**F) Pearson's  $r$  correlation coefficient = 0.850**

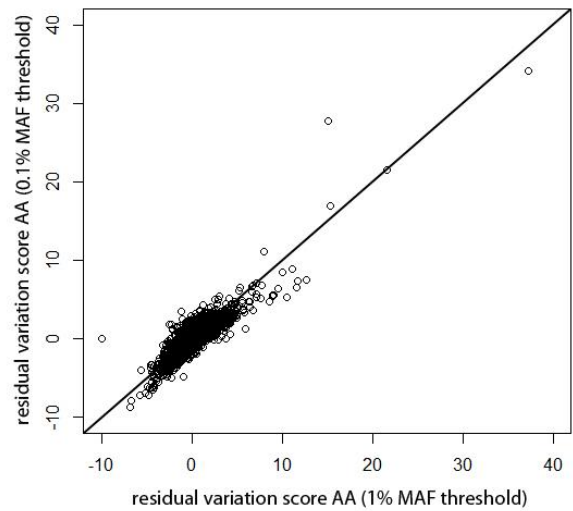

**G) Pearson's  $r$  correlation coefficient = 0.733**

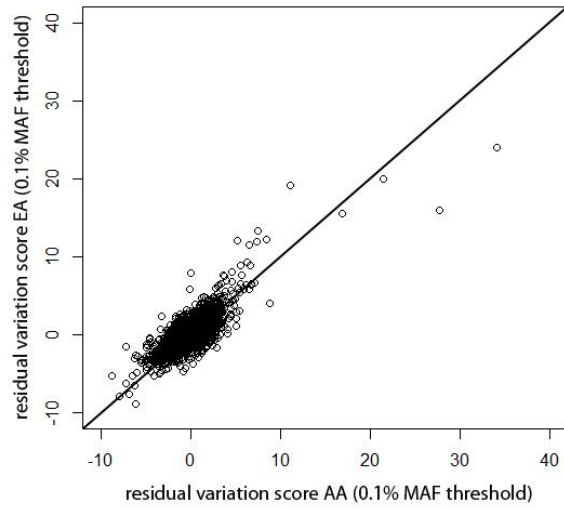

**H) Pearson's  $r$  correlation coefficient = 0.685**

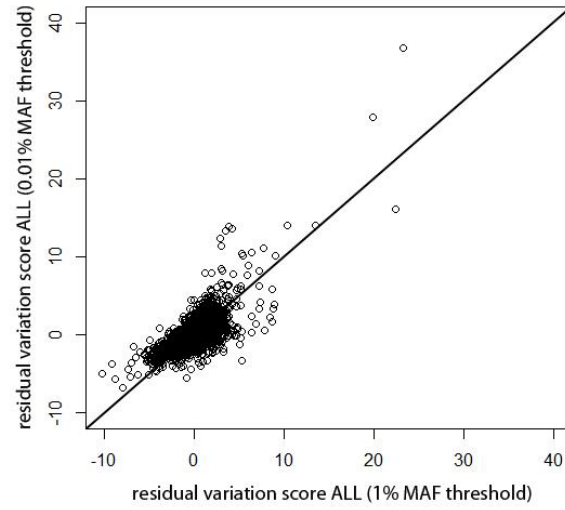

Supplement: pgen.1003709.s005.pdf [file pgen.1003709.s005.pdf]
