# Supplementary material for: Genic Intolerance to Functional Variation and the Interpretation of Personal Genomes
Source: PubMed Central journal article supplement (PMC3749936; doi:10.1371/journal.pgen.1003709), 2013-08-22

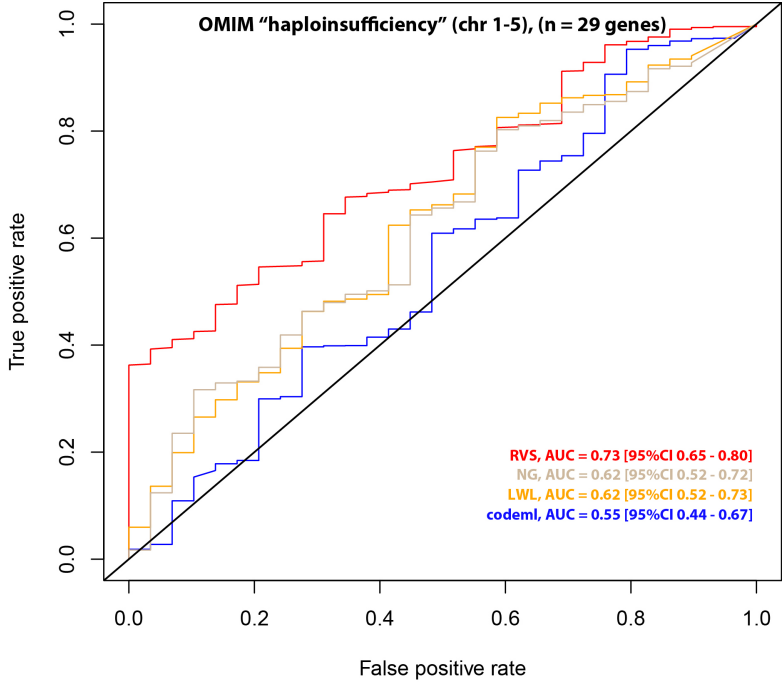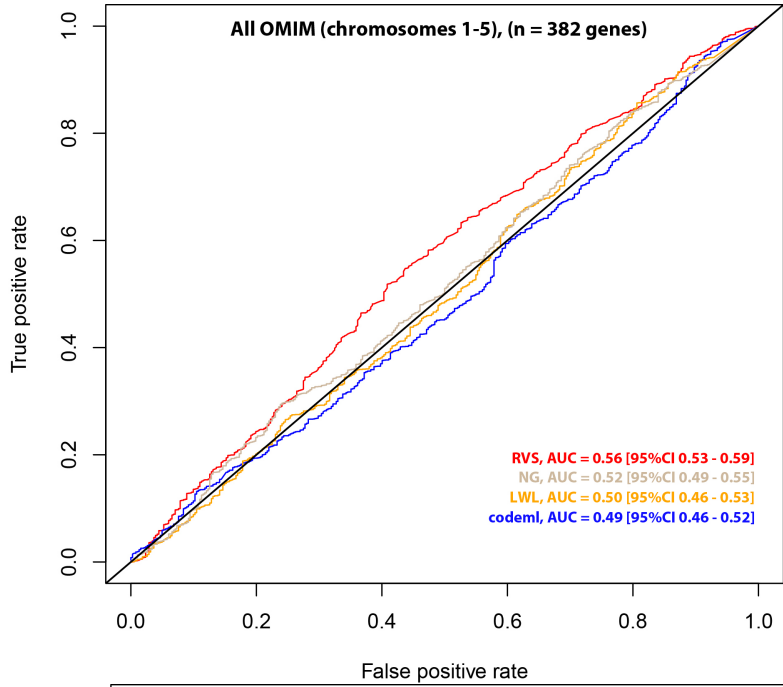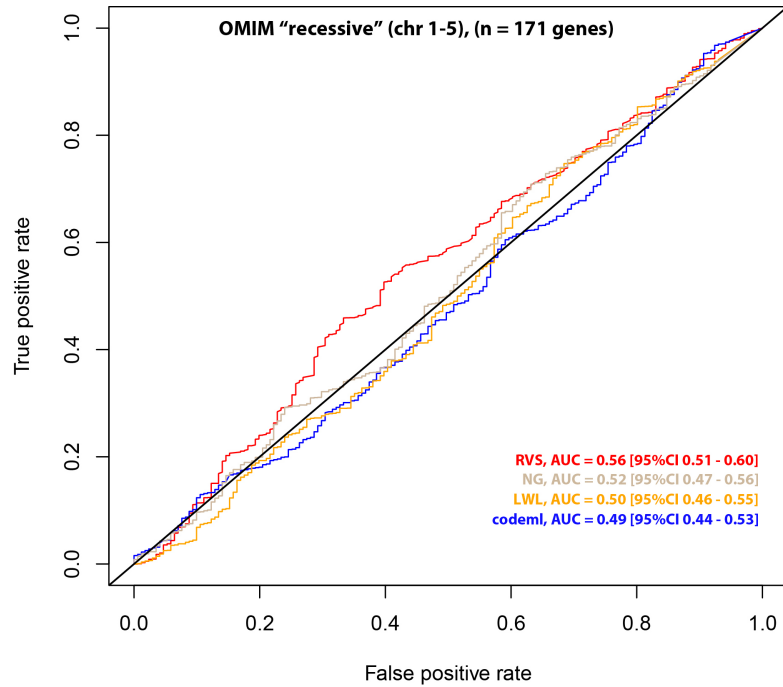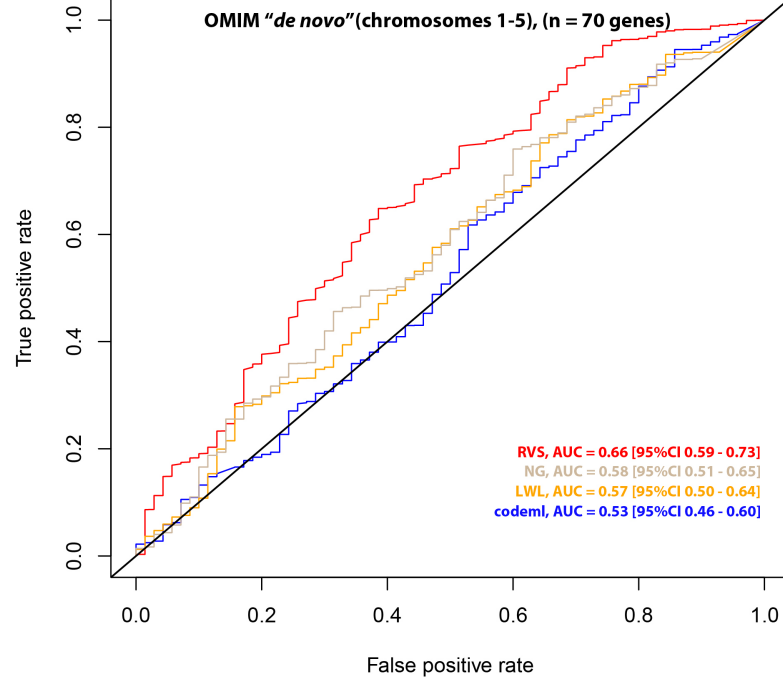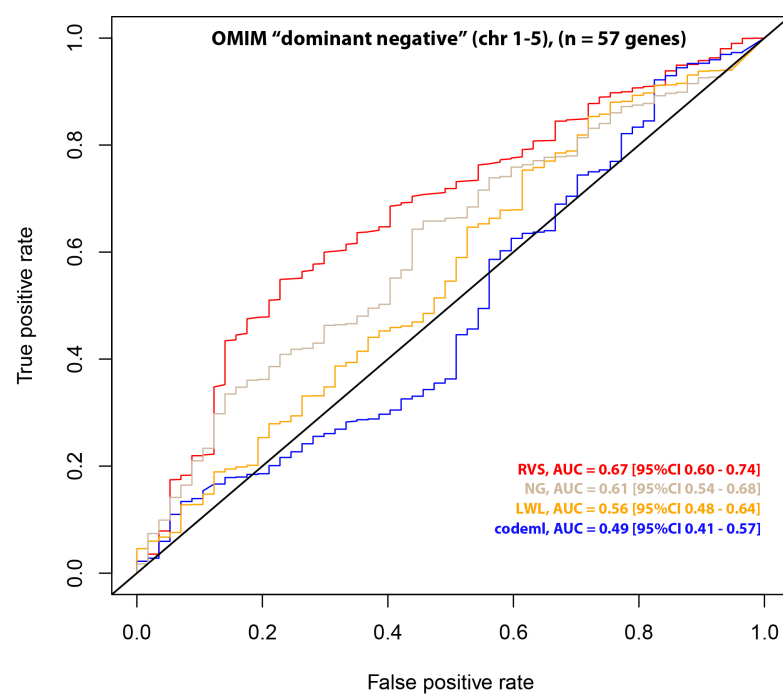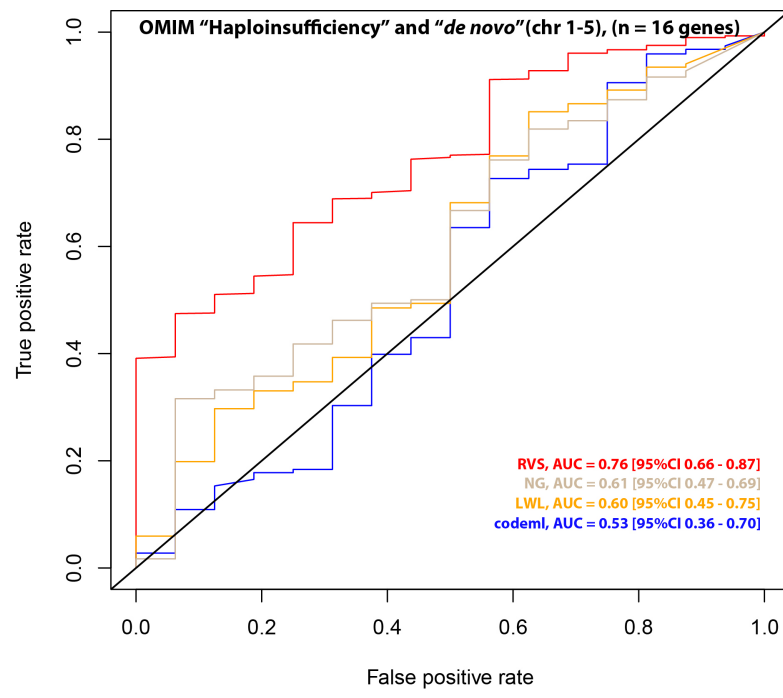

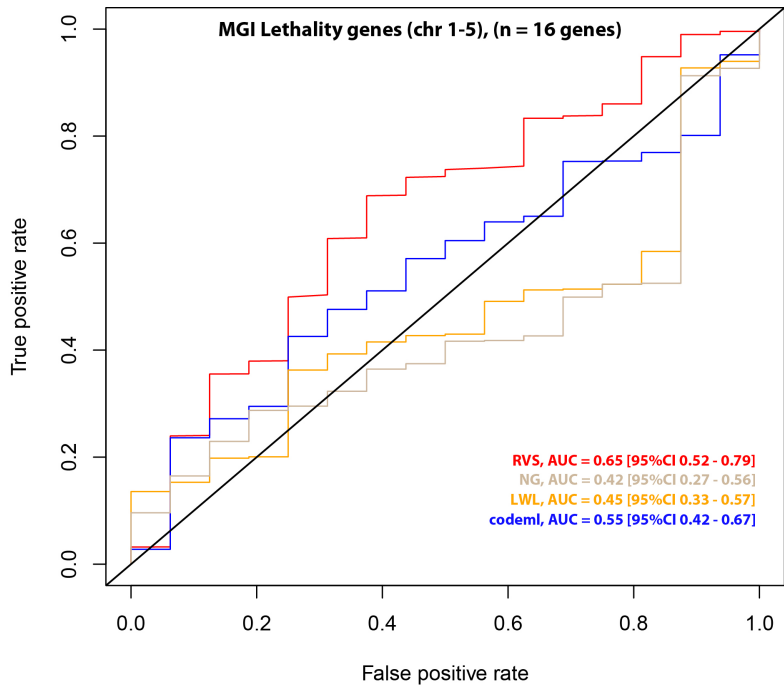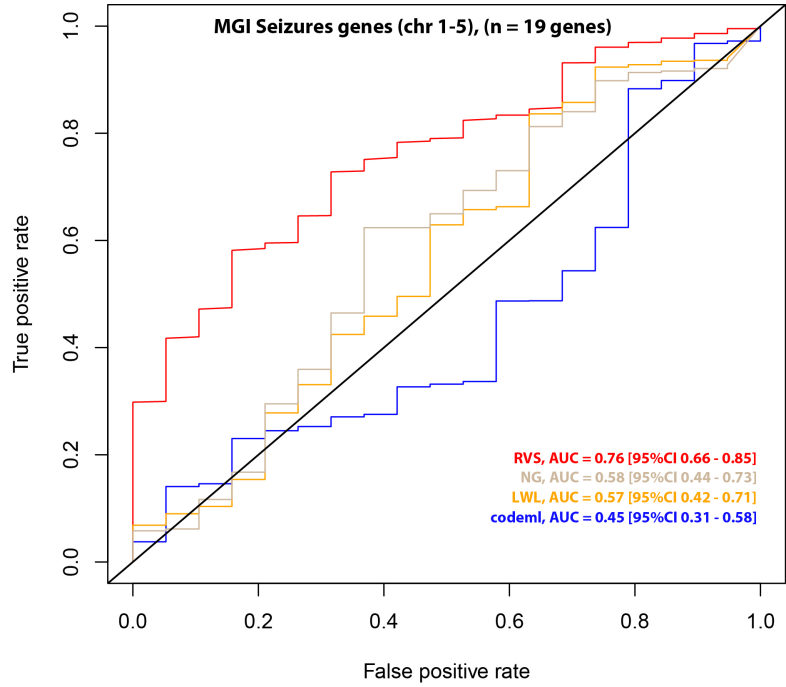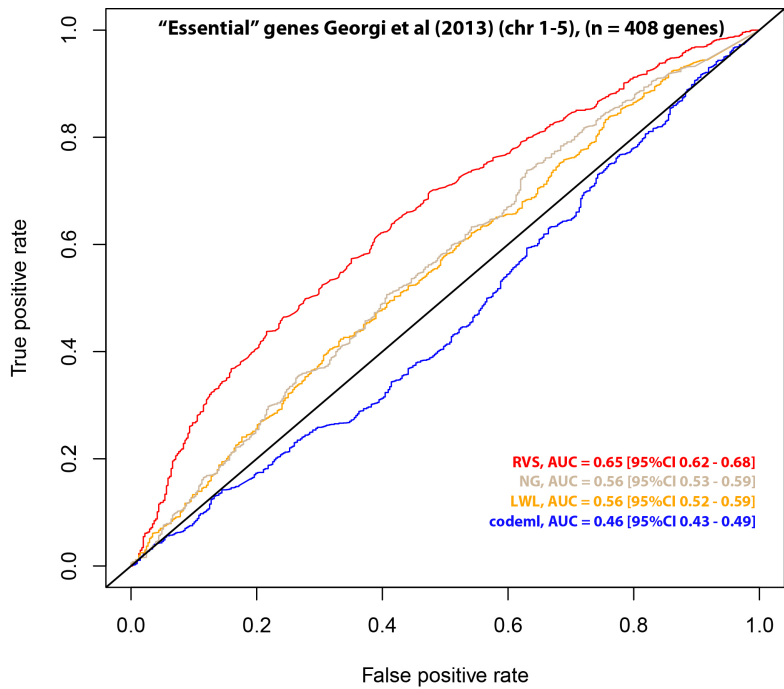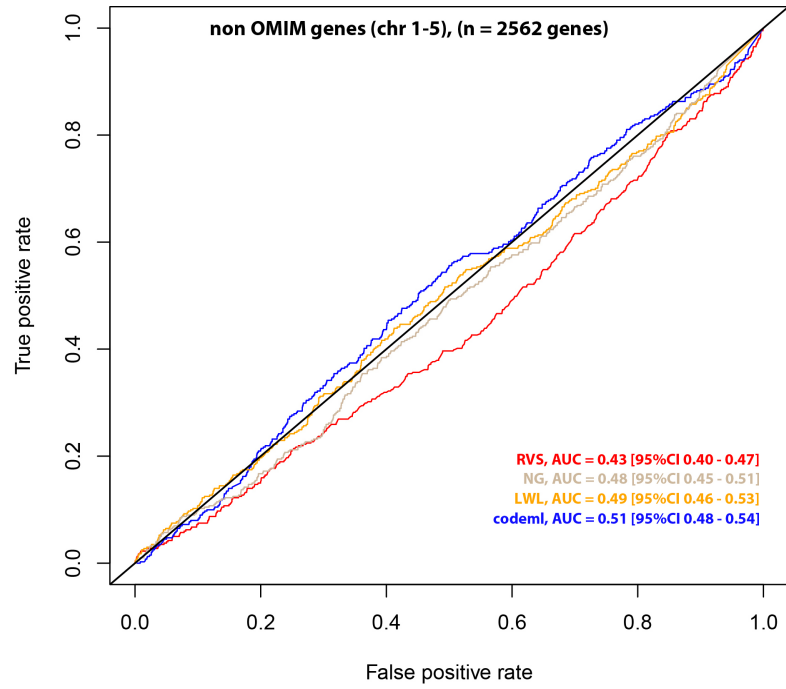

Supplement: pgen.1003709.s007.pdf [file pgen.1003709.s007.pdf]
